# Supplementary material for: Host genetic variation impacts microbiome composition across human body sites
Source: PubMed Central journal article supplement (PMC4570153; doi:10.1186/s13059-015-0759-1), 2015-09-15
Supplement: 13059_2015_759_MOESM2_ESM.pdf [file 13059_2015_759_MOESM2_ESM.pdf]

| <b>Additional file 2</b>                                                                     |                       |                                                                                                                                                                                                                                                                                                                   |
|----------------------------------------------------------------------------------------------|-----------------------|-------------------------------------------------------------------------------------------------------------------------------------------------------------------------------------------------------------------------------------------------------------------------------------------------------------------|
| <b>Table S1. Canonical pathways enriched in genes correlated with microbiome composition</b> |                       |                                                                                                                                                                                                                                                                                                                   |
| <b>Host pathway</b>                                                                          | <b>P-value</b>        | <b>Microbiome taxa</b>                                                                                                                                                                                                                                                                                            |
| Leptin Signaling in Obesity                                                                  | 2.29×10 <sup>-7</sup> | Veillonella (Anterior nares), Lachnospiraceae (Attached Keratinized gingiva), Haemophilus (Attached Keratinized gingiva), Clostridium (Right Antecubital fossa), Bacteroides (Right Retroauricular crease), Propionibacterium (Subgingival plaque)                                                                |
| G Protein Signaling Mediated by Tubby                                                        | 9.33×10 <sup>-6</sup> | Bacteroides (Anterior nares), Veillonella (Anterior nares), Lachnospiraceae (Attached Keratinized gingiva), Clostridium (Right Antecubital fossa)                                                                                                                                                                 |
| P2Y Purigenic Receptor Signaling Pathway                                                     | 9.33×10 <sup>-6</sup> | Bacteroides (Anterior nares), Veillonella (Anterior nares), Lachnospiraceae (Attached Keratinized gingiva), Haemophilus (Attached Keratinized gingiva), Clostridium (Right Antecubital fossa), Bacteroides (Right Retroauricular crease), Propionibacterium (Subgingival plaque)                                  |
| Melatonin Signaling                                                                          | 2.75×10 <sup>-5</sup> | Veillonella (Anterior nares), Lachnospiraceae (Attached Keratinized gingiva), Haemophilus (Attached Keratinized gingiva), Azospira (Buccal mucosa), Clostridium (Right Antecubital fossa), Propionibacterium (Subgingival plaque)                                                                                 |
| D-myo-inositol (1,4,5)-Trisphosphate Biosynthesis                                            | 7.41×10 <sup>-5</sup> | Veillonella (Anterior nares), Lachnospiraceae (Attached Keratinized gingiva), Clostridium (Right Antecubital fossa), Propionibacterium (Subgingival plaque)                                                                                                                                                       |
| UVA-Induced MAPK Signaling                                                                   | 1.23×10 <sup>-4</sup> | Veillonella (Anterior nares), Lachnospiraceae (Attached Keratinized gingiva), Clostridium (Right Antecubital fossa), Propionibacterium (Subgingival plaque), Campylobacter (Supragingival plaque)                                                                                                                 |
| CREB Signaling in Neurons                                                                    | 1.23×10 <sup>-4</sup> | Bacteroides (Anterior nares), Veillonella (Anterior nares), Lachnospiraceae (Attached Keratinized gingiva), Haemophilus (Attached Keratinized gingiva), Clostridium (Right Antecubital fossa), Bacteroides (Right Retroauricular crease), Propionibacterium (Subgingival plaque)                                  |
| Cardiac Hypertrophy Signaling                                                                | 1.23×10 <sup>-4</sup> | Bacteroides (Anterior nares), Veillonella (Anterior nares), Lachnospiraceae (Attached Keratinized gingiva), Haemophilus (Attached Keratinized gingiva), Clostridium (Right Antecubital fossa), Bacteroides (Right Retroauricular crease), Prevotella (Subgingival plaque), Propionibacterium (Subgingival plaque) |
| Role of NFAT in Cardiac Hypertrophy                                                          | 1.62×10 <sup>-4</sup> | Bacteroides (Anterior nares), Veillonella (Anterior nares), Lachnospiraceae (Attached Keratinized gingiva), Haemophilus (Attached Keratinized gingiva), Clostridium (Right Antecubital fossa), Bacteroides (Right Retroauricular crease), Propionibacterium (Subgingival plaque)                                  |
| Thrombin Signaling                                                                           | 2.23×10 <sup>-4</sup> | Bacteroides (Anterior nares), Veillonella (Anterior nares), Lachnospiraceae (Attached Keratinized gingiva), Haemophilus (Attached Keratinized gingiva), Clostridium (Right Antecubital fossa), Bacteroides (Right Retroauricular crease), Propionibacterium (Subgingival plaque)                                  |
| Glioblastoma Multiforme Signaling                                                            | 2.57×10 <sup>-4</sup> | Veillonella (Anterior nares), Lachnospiraceae (Attached Keratinized gingiva), Haemophilus (Attached Keratinized gingiva), Haemophilus (Buccal mucosa), Clostridium (Right Antecubital fossa), Propionibacterium (Subgingival plaque)                                                                              |
| JAK/Stat Signaling                                                                           | 2.57×10 <sup>-4</sup> | Haemophilus (Attached Keratinized gingiva), Clostridium (Right Antecubital fossa), Propionibacterium (Subgingival plaque)                                                                                                                                                                                         |
| Chemokine Signaling                                                                          | 2.95×10 <sup>-4</sup> | Veillonella (Anterior nares), Lachnospiraceae (Attached Keratinized gingiva), Haemophilus (Attached Keratinized gingiva), Clostridium (Right Antecubital fossa), Propionibacterium (Subgingival plaque)                                                                                                           |
| Aldosterone Signaling in Epithelial Cells                                                    | 3.16×10 <sup>-4</sup> | Veillonella (Anterior nares), Lachnospiraceae (Attached Keratinized gingiva), Haemophilus (Attached Keratinized gingiva), Clostridium (Right Antecubital fossa), Propionibacterium (Subgingival plaque)                                                                                                           |
| CXCR4 Signaling                                                                              | 3.23×10 <sup>-4</sup> | Bacteroides (Anterior nares), Veillonella (Anterior nares), Haemophilus (Attached Keratinized gingiva), Clostridium (Right Antecubital fossa), Bacteroides (Right Retroauricular crease), Propionibacterium (Subgingival plaque)                                                                                  |
| Renin-Angiotensin Signaling                                                                  | 3.31×10 <sup>-4</sup> | Lachnospiraceae (Attached Keratinized gingiva), Haemophilus (Attached Keratinized gingiva), Clostridium (Right Antecubital fossa), Bacteroides (Right Retroauricular crease), Propionibacterium (Subgingival plaque)                                                                                              |
| Sphingosine-1-phosphate Signaling                                                            | 3.46×10 <sup>-4</sup> | Veillonella (Anterior nares), Lachnospiraceae (Attached Keratinized gingiva), Clostridium (Right Antecubital fossa), Bacteroides (Right Retroauricular crease), Propionibacterium (Subgingival plaque)                                                                                                            |
| Gap Junction Signaling                                                                       | 3.63×10 <sup>-4</sup> | Veillonella (Anterior nares), Lachnospiraceae (Attached Keratinized gingiva), Haemophilus (Attached Keratinized gingiva), Clostridium (Right Antecubital fossa), Bacteroides (Right Retroauricular crease), Propionibacterium (Subgingival plaque)                                                                |
| Prolactin Signaling                                                                          | 3.8×10 <sup>-4</sup>  | Lachnospiraceae (Attached Keratinized gingiva), Haemophilus (Attached Keratinized gingiva), Clostridium (Right Antecubital fossa), Propionibacterium (Subgingival plaque)                                                                                                                                         |
| CCR3 Signaling in Eosinophils                                                                | 4.37×10 <sup>-4</sup> | Bacteroides (Anterior nares), Veillonella (Anterior nares), Haemophilus (Attached Keratinized gingiva), Clostridium (Right Antecubital fossa), Propionibacterium (Subgingival plaque)                                                                                                                             |
| 14-3-3-mediated Signaling                                                                    | 4.78×10 <sup>-4</sup> | Veillonella (Anterior nares), Lachnospiraceae (Attached Keratinized gingiva), Haemophilus (Attached Keratinized gingiva), Clostridium (Right Antecubital fossa), Propionibacterium (Subgingival plaque)                                                                                                           |
| PDGF Signaling                                                                               | 4.9×10 <sup>-4</sup>  | Lachnospiraceae (Attached Keratinized gingiva), Haemophilus (Attached Keratinized gingiva), Streptococcus (Palatine Tonsils), Clostridium (Right Antecubital fossa), Propionibacterium (Subgingival plaque)                                                                                                       |
| p70S6K Signaling                                                                             | 5.5×10 <sup>-4</sup>  | Veillonella (Anterior nares), Lachnospiraceae (Attached Keratinized gingiva), Haemophilus (Attached Keratinized gingiva), Clostridium (Right Antecubital fossa), Propionibacterium (Subgingival plaque)                                                                                                           |
| PPAR $\alpha$ /RXR $\alpha$ Activation                                                       | 7.59×10 <sup>-4</sup> | Veillonella (Anterior nares), Lachnospiraceae (Attached Keratinized gingiva), Haemophilus (Attached Keratinized gingiva), Clostridium (Right Antecubital fossa), Bacteroides (Right Retroauricular crease), Propionibacterium (Subgingival plaque)                                                                |
| PI3K Signaling in B Lymphocytes                                                              | 7.76×10 <sup>-4</sup> | Veillonella (Anterior nares), Lachnospiraceae (Attached Keratinized gingiva), Haemophilus (Attached Keratinized gingiva), Clostridium (Right Antecubital fossa), Streptococcus (Saliva), Propionibacterium (Subgingival plaque)                                                                                   |

**Table S2. Enrichment of pathways of interest from table S1 using various cutoffs for P-value and distance from genes (D).** Each column describes a cutoff combination, with the number of genes tested in the header. Each cell lists the pathway enrichment P-value and the rank in parentheses.

| <b>Pathway</b>                                                               | <b>P ≤ 10<sup>-6</sup>; D ≤ 50k<br/>(203 genes)</b> | <b>P ≤ 10<sup>-6</sup>; D ≤ 20k<br/>(138 genes)</b> | <b>P ≤ 10<sup>-6</sup>; D ≤ 5k<br/>(90 genes)</b> | <b>P ≤ 5×10<sup>-7</sup>; D ≤ 50k<br/>(105 genes)</b> | <b>P ≤ 5×10<sup>-7</sup>; D ≤ 20k<br/>(70 genes)</b> |
|------------------------------------------------------------------------------|-----------------------------------------------------|-----------------------------------------------------|---------------------------------------------------|-------------------------------------------------------|------------------------------------------------------|
| Leptin signaling in Obesity                                                  | 2.29×10 <sup>-7</sup> (1)                           | 7.58×10 <sup>-5</sup> (2)                           | 1.44×10 <sup>-5</sup> (2)                         | 1.86×10 <sup>-5</sup> (2)                             | 2.95×10 <sup>-4</sup> (2)                            |
| Melatonin Signaling                                                          | 2.75×10 <sup>-5</sup> (4)                           | 0.063 (83)                                          | 0.033 (75)                                        | 3.46×10 <sup>-3</sup> (24)                            | --                                                   |
| JAK/Stat Signaling                                                           | 2.57×10 <sup>-4</sup> (12)                          | 7.08×10 <sup>-3</sup> (21)                          | 0.031 (70)                                        | 3.09×10 <sup>-3</sup> (21)                            | 0.017 (34)                                           |
| Chemokine Signaling                                                          | 2.95×10 <sup>-4</sup> (13)                          | 7.76×10 <sup>-3</sup> (23)                          | 2.88×10 <sup>-3</sup> (15)                        | 3.39×10 <sup>-3</sup> (23)                            | 0.018 (39)                                           |
| CXCR4 Signaling                                                              | 3.23×10 <sup>-4</sup> (15)                          | 1.34×10 <sup>-3</sup> (7)                           | 3.72×10 <sup>-3</sup> (18)                        | 4.47×10 <sup>-3</sup> (29)                            | 0.011 (21)                                           |
| Role of Pattern Recognition Receptors in Recognition of Bacteria and Viruses | 0.047 (95)                                          | 0.018 (38)                                          | 7.24×10 <sup>-3</sup> (33)                        | 8.51×10 <sup>-3</sup> (43)                            | 3.09×10 <sup>-3</sup> (10)                           |

**Table S3. GO categories enriched in host genes correlated with microbiome composition using InnateDB**

| GO term Name                                                                 | GO term ID | Genes Ratio | GO term P-value | GO term P-value (corrected) | Gene Symbols                                                                                                                                                                                                                                                                                                                                                                                                                                                                                                                                            |
|------------------------------------------------------------------------------|------------|-------------|-----------------|-----------------------------|---------------------------------------------------------------------------------------------------------------------------------------------------------------------------------------------------------------------------------------------------------------------------------------------------------------------------------------------------------------------------------------------------------------------------------------------------------------------------------------------------------------------------------------------------------|
| interleukin-12-mediated signaling pathway [biological_process]               | GO:0035722 | 67%         | 0.00020         | 0.05683                     | JAK2 ; PLCB1 ;                                                                                                                                                                                                                                                                                                                                                                                                                                                                                                                                          |
| phosphoric diester hydrolase activity [molecular_function]                   | GO:0008081 | 12%         | 0.00015         | 0.05746                     | PLCB1 ; PLCB4 ; PLCG2 ; PLCZ1 ;                                                                                                                                                                                                                                                                                                                                                                                                                                                                                                                         |
| androgen receptor signaling pathway [biological_process]                     | GO:0030521 | 9%          | 0.00044         | 0.06094                     | CCNE1 ; CDK7 ; FKBP4 ; THRAP3 ;                                                                                                                                                                                                                                                                                                                                                                                                                                                                                                                         |
| mitotic cell cycle [biological_process]                                      | GO:0000278 | 3%          | 0.00039         | 0.06254                     | CCNE1 ; CDCA8 ; CDK5RAP2 ; CDK7 ; CEP192 ; FEN1 ; MAD1L1 ; POLE ; SEH1L ; ZWINT ;                                                                                                                                                                                                                                                                                                                                                                                                                                                                       |
| nucleus [cellular_component]                                                 | GO:0005634 | 1%          | 0.00011         | 0.06331                     | ANKRD1 ; BCL10 ; CABLES1 ; CACNA1A ; CBLB ; CCNE1 ; CDCA8 ; CDK7 ; CEBPZ ; CTBP2 ; ETHE1 ; FADS1 ; FEN1 ; FKBP4 ; FOXM1 ; JAK2 ; KAZN ; KDM5B ; KLF15 ; LANCL1 ; LMCD1 ; LPP ; LYRM4 ; MAD1L1 ; MAP2K2 ; MDFIC ; METTL3 ; NARG2 ; NRIP2 ; OSBPL1A ; PAK7 ; PARP4 ; PHAX ; PIAS4 ; PLCB1 ; PLCB4 ; PLCZ1 ; POLE ; RAB2B ; RORA ; RSPO1 ; SALL2 ; SH3BGRL2 ; SLC25A10 ; STK40 ; TFAP2A ; THRAP3 ; TOX4 ; XPA ; XRCC1 ; ZBTB7A ; ZFP28 ; ZNF148 ; ZNF165 ; ZNF343 ; ZNF470 ; ZNF555 ; ZNF556 ; ZNF57 ; ZNF575 ; ZNF71 ; ZNF77 ; ZNF786 ; ZSCAN16 ; ZWINT ; |
| phospholipase C activity [molecular_function]                                | GO:0004629 | 18%         | 0.00035         | 0.06495                     | PLCB4 ; PLCG2 ; PLCZ1 ;                                                                                                                                                                                                                                                                                                                                                                                                                                                                                                                                 |
| sulfide oxidation, using sulfide:quinone oxidoreductase [biological_process] | GO:0070221 | 40%         | 0.00067         | 0.06814                     | ETHE1 ; SLC25A10 ;                                                                                                                                                                                                                                                                                                                                                                                                                                                                                                                                      |
| intracellular [cellular_component]                                           | GO:0005622 | 1%          | 0.00074         | 0.06837                     | ADCY5 ; ARL16 ; BCL10 ; CAPN13 ; CLNK ; EIF2AK2 ; FKBP4 ; HGS ; KDM5B ; KLF15 ; MRPL12 ; OSBPL1A ; PLCB4 ; PLCZ1 ; PREX1 ; RAB2B ; RANBP17 ; SALL2 ; SLC25A10 ; ZBTB7A ; ZFP28 ; ZNF148 ; ZNF165 ; ZNF343 ; ZNF470 ; ZNF555 ; ZNF556 ; ZNF57 ; ZNF575 ; ZNF71 ; ZNF77 ; ZNF786 ; ZSCAN16 ;                                                                                                                                                                                                                                                              |
| ion transport [biological_process]                                           | GO:0006811 | 3%          | 0.00086         | 0.07326                     | CACNA1A ; GABRR1 ; GABRR2 ; KCNH1 ; P2RX2 ; RYR3 ; SLC1A2 ; SLC24A3 ; SLC25A10 ;                                                                                                                                                                                                                                                                                                                                                                                                                                                                        |
| gamma-aminobutyric acid signaling pathway [biological_process]               | GO:0007214 | 14%         | 0.00067         | 0.07439                     | CACNA1A ; GABRR1 ; GABRR2 ;                                                                                                                                                                                                                                                                                                                                                                                                                                                                                                                             |
| intracellular signal transduction [biological_process]                       | GO:0035556 | 3%          | 0.00034         | 0.07561                     | ADCY5 ; CBLB ; CLNK ; JAK2 ; PLCB1 ; PLCB4 ; PLCG2 ; PLCZ1 ; PREX1 ; SOCS6 ;                                                                                                                                                                                                                                                                                                                                                                                                                                                                            |
| intracellular membrane-bounded organelle [cellular_component]                | GO:0043231 | 3%          | 0.00064         | 0.07921                     | FADS1 ; HGS ; KAZN ; KDM5B ; LANCL1 ; MIB1 ; PREX1 ; SYT2 ; TFAP2A ; THRAP3 ; ZWINT ;                                                                                                                                                                                                                                                                                                                                                                                                                                                                   |
| mitotic metaphase [biological_process]                                       | GO:0000089 | 33%         | 0.00100         | 0.07986                     | CDCA8 ; MAD1L1 ;                                                                                                                                                                                                                                                                                                                                                                                                                                                                                                                                        |
| sulfur amino acid metabolic process [biological_process]                     | GO:0000096 | 12%         | 0.00127         | 0.09405                     | CACNA1A ; ETHE1 ; SLC25A10 ;                                                                                                                                                                                                                                                                                                                                                                                                                                                                                                                            |

**Table S4. Pathways enriched in host genes correlated with microbiome composition using InnateDB**

| Pathway Name                                                                                                                                        | Pathway Database | Genes Ratio | Pathway P-value | Pathway P-value (corrected) | Gene Symbols                                             |
|-----------------------------------------------------------------------------------------------------------------------------------------------------|------------------|-------------|-----------------|-----------------------------|----------------------------------------------------------|
| Inositol phosphate metabolism                                                                                                                       | KEGG             | 9%          | 0.00012         | 0.02097                     | PIK3C2G ; PLCB1 ; PLCB4 ; PLCG2 ; PLCZ1 ;                |
| Base excision repair                                                                                                                                | KEGG             | 12%         | 0.00017         | 0.01468                     | FEN1 ; PARP4 ; POLE ; XRCC1 ;                            |
| GABA A (rho) receptor activation                                                                                                                    | REACTOME         | 67%         | 0.00022         | 0.01234                     | GABRR1 ; GABRR2 ;                                        |
| Inositol phosphate metabolism ( Inositol phosphate metabolism )                                                                                     | INOH             | 10%         | 0.00045         | 0.01893                     | PLCB1 ; PLCB4 ; PLCG2 ; PLCZ1 ;                          |
| Phosphatidylinositol signaling system                                                                                                               | KEGG             | 7%          | 0.00046         | 0.01532                     | PIK3C2G ; PLCB1 ; PLCB4 ; PLCG2 ; PLCZ1 ;                |
| Calcium signaling pathway                                                                                                                           | KEGG             | 4%          | 0.00066         | 0.01847                     | CACNA1A ; P2RX2 ; PLCB1 ; PLCB4 ; PLCG2 ; PLCZ1 ; RYR3 ; |
| Sulfide oxidation to sulfate                                                                                                                        | REACTOME         | 40%         | 0.00073         | 0.01743                     | ETHE1 ; SLC25A10 ;                                       |
| PLC beta signaling ( GPCR GroupI metabotropic glutamate receptor signaling pathway )                                                                | INOH             | 29%         | 0.00151         | 0.02814                     | PLCB1 ; PLCB4 ;                                          |
| PLC beta signaling ( GPCR signaling ( G alpha q ) )                                                                                                 | INOH             | 29%         | 0.00151         | 0.02814                     | PLCB1 ; PLCB4 ;                                          |
| Heterotrimeric GPCR signaling pathway (through glutamate, G alpha q and PLC beta) ( GPCR GroupI metabotropic glutamate receptor signaling pathway ) | INOH             | 11%         | 0.00174         | 0.02929                     | MAP2K2 ; PLCB1 ; PLCB4 ;                                 |
| KitReceptor                                                                                                                                         | NETPATH          | 5%          | 0.00200         | 0.03057                     | CBLB ; JAK2 ; MAP2K2 ; PLCG2 ; SOCS6 ;                   |
| Fmlp induced chemokine gene expression in hmc-1 cells                                                                                               | PID BIOCARTA     | 10%         | 0.00213         | 0.02988                     | MAP2K2 ; PIK3C2G ; PLCB1 ;                               |
| BCR                                                                                                                                                 | NETPATH          | 4%          | 0.00246         | 0.03175                     | BCL10 ; CBLB ; CCNE1 ; CDK7 ; MAP2K2 ; PLCG2 ;           |
| Heterotrimeric GPCR signaling pathway (through Adenosine G alpha s) ( GPCR Adenosine A2A receptor signaling pathway )                               | INOH             | 9%          | 0.00307         | 0.03683                     | ADCY5 ; CBLB ; MAP2K2 ;                                  |
| Long-term depression                                                                                                                                | KEGG             | 6%          | 0.00308         | 0.03447                     | CACNA1A ; MAP2K2 ; PLCB1 ; PLCB4 ;                       |
| Synthesis of bile acids and bile salts via 24-hydroxycholesterol                                                                                    | REACTOME         | 20%         | 0.00318         | 0.03139                     | CYP46A1 ; CYP8B1 ;                                       |
| Synthesis of bile acids and bile salts via 24-hydroxycholesterol                                                                                    | PID NCI          | 20%         | 0.00318         | 0.03139                     | CYP46A1 ; CYP8B1 ;                                       |
| G alpha (q) signalling events                                                                                                                       | REACTOME         | 8%          | 0.00422         | 0.03939                     | GNG2 ; PLCB1 ; PLCB4 ;                                   |
| Chemokine signaling pathway                                                                                                                         | KEGG             | 3%          | 0.00505         | 0.04462                     | ADCY5 ; GNG2 ; JAK2 ; PLCB1 ; PLCB4 ; PREX1 ;            |
| IL2                                                                                                                                                 | NETPATH          | 5%          | 0.00520         | 0.04368                     | CCNE1 ; JAK2 ; MAP2K2 ; PLCB1 ;                          |
| Cyclin E associated events during G1/S transition                                                                                                   | PID NCI          | 15%         | 0.00541         | 0.04332                     | CCNE1 ; CDK7 ;                                           |
| Salivary secretion                                                                                                                                  | KEGG             | 5%          | 0.00543         | 0.04147                     | ADCY5 ; PLCB1 ; PLCB4 ; RYR3 ;                           |
| Mitotic Prometaphase                                                                                                                                | PID NCI          | 5%          | 0.00591         | 0.04320                     | CDCA8 ; MAD1L1 ; SEH1L ; ZWINT ;                         |
| Cyclin E associated events during G1/S transition                                                                                                   | REACTOME         | 14%         | 0.00628         | 0.04397                     | CCNE1 ; CDK7 ;                                           |
| Nucleotide excision repair                                                                                                                          | KEGG             | 7%          | 0.00639         | 0.04291                     | CDK7 ; POLE ; XPA ;                                      |
| ErbB signaling pathway                                                                                                                              | KEGG             | 5%          | 0.00643         | 0.03998                     | CBLB ; MAP2K2 ; PAK7 ; PLCG2 ;                           |
| Gap junction                                                                                                                                        | KEGG             | 5%          | 0.00643         | 0.03998                     | ADCY5 ; MAP2K2 ; PLCB1 ; PLCB4 ;                         |
| TCR                                                                                                                                                 | NETPATH          | 3%          | 0.00647         | 0.03885                     | ANXA2 ; BCL10 ; CBLB ; HGS ; MAP2K2 ; PHLDB3 ; PLCG2 ;   |
| Mitotic Prometaphase                                                                                                                                | REACTOME         | 5%          | 0.00669         | 0.03876                     | CDCA8 ; MAD1L1 ; SEH1L ; ZWINT ;                         |
| PLC beta mediated events                                                                                                                            | REACTOME         | 13%         | 0.00721         | 0.04037                     | PLCB1 ; PLCB4 ;                                          |
| Cadmium induces dna synthesis and proliferation in macrophages                                                                                      | PID BIOCARTA     | 13%         | 0.00819         | 0.04301                     | MAP2K2 ; PLCB1 ;                                         |
| Primary bile acid biosynthesis                                                                                                                      | KEGG             | 13%         | 0.00819         | 0.04301                     | CYP46A1 ; CYP8B1 ;                                       |
| CXCR4-mediated signaling events                                                                                                                     | PID NCI          | 6%          | 0.00911         | 0.04636                     | GNG2 ; HGS ; JAK2 ;                                      |
| GnRH signaling pathway                                                                                                                              | KEGG             | 4%          | 0.01011         | 0.04855                     | ADCY5 ; MAP2K2 ; PLCB1 ; PLCB4 ;                         |
| Melanogenesis                                                                                                                                       | KEGG             | 4%          | 0.01011         | 0.04855                     | ADCY5 ; MAP2K2 ; PLCB1 ; PLCB4 ;                         |
| Ligand-gated ion channel transport                                                                                                                  | REACTOME         | 11%         | 0.01033         | 0.04820                     | GABRR1 ; GABRR2 ;                                        |
| Resolution of Sister Chromatid Cohesion                                                                                                             | REACTOME         | 4%          | 0.01084         | 0.04921                     | CDCA8 ; MAD1L1 ; SEH1L ; ZWINT ;                         |
| Dual incision reaction in GG-NER                                                                                                                    | REACTOME         | 10%         | 0.01268         | 0.04956                     | CDK7 ; XPA ;                                             |
| Dual incision reaction in GG-NER                                                                                                                    | PID NCI          | 10%         | 0.01268         | 0.04956                     | CDK7 ; XPA ;                                             |
| Formation of incision complex in GG-NER                                                                                                             | REACTOME         | 10%         | 0.01268         | 0.04956                     | CDK7 ; XPA ;                                             |
| Formation of incision complex in GG-NER                                                                                                             | PID NCI          | 10%         | 0.01268         | 0.04956                     | CDK7 ; XPA ;                                             |
| G beta:gamma signalling through PLC beta                                                                                                            | REACTOME         | 10%         | 0.01268         | 0.04956                     | GNG2 ; PLCB1 ;                                           |
| Global Genomic NER (GG-NER)                                                                                                                         | PID NCI          | 10%         | 0.01268         | 0.04956                     | CDK7 ; XPA ;                                             |
| Pkc-catalyzed phosphorylation of inhibitory phosphoprotein of myosin phosphatase                                                                    | PID BIOCARTA     | 10%         | 0.01394         | 0.04984                     | CACNA1A ; PLCB1 ;                                        |
| Presynaptic function of Kainate receptors                                                                                                           | REACTOME         | 10%         | 0.01394         | 0.04984                     | GNG2 ; PLCB1 ;                                           |
| Signal transduction by L1                                                                                                                           | PID NCI          | 10%         | 0.01394         | 0.04984                     | MAP2K2 ; NCAM1 ;                                         |

| Table S5. Correlations between host coding genomic sites and microbiome taxa by body site |           |                       |                      |                      |                |                                                                                                                                                                                               |                                                                                                                                                                                                                                                                                                 |                                                                                             |                                                                                                      |
|-------------------------------------------------------------------------------------------|-----------|-----------------------|----------------------|----------------------|----------------|-----------------------------------------------------------------------------------------------------------------------------------------------------------------------------------------------|-------------------------------------------------------------------------------------------------------------------------------------------------------------------------------------------------------------------------------------------------------------------------------------------------|---------------------------------------------------------------------------------------------|------------------------------------------------------------------------------------------------------|
| Body Site                                                                                 | Chrom     | Position <sup>1</sup> | SNP <sup>2</sup>     | P-value <sup>3</sup> | R <sup>2</sup> | Type                                                                                                                                                                                          | Annotation <sup>4</sup>                                                                                                                                                                                                                                                                         | FDR Q-value                                                                                 | Bacteria                                                                                             |
| Anterior nares                                                                            | 2         | 24290671              | rs61742149           | 1.13E-05             | 0.018          | synonymous                                                                                                                                                                                    | SFB14:NM_016047:exon4:c.C339T;p.L113L                                                                                                                                                                                                                                                           | 0.08990352                                                                                  | Root_p_Firmicutes_c_Bacilli                                                                          |
|                                                                                           | 10        | 129921195             | rs1063536            | 1.07E-05             | 0.063          | synonymous                                                                                                                                                                                    | MKI67:NM_001145966:exon4:c.T237A;p.P79P;MKI67:NM_002417:exon4:c.T237A;p.P79P                                                                                                                                                                                                                    | 0.08990352                                                                                  | Root_p_Firmicutes_c_Bacilli                                                                          |
|                                                                                           | 14        | 93276654              | rs1040835            | 1.70E-06             | 0.092          | nonsynonymous                                                                                                                                                                                 | GOLGA5:NM_005113:exon5:c.T1048C;p.F350L                                                                                                                                                                                                                                                         | 0.04038523                                                                                  | Root_p_Firmicutes_c_Bacilli                                                                          |
|                                                                                           | 16        | 84522897              | rs436278             | 8.09E-07             | 0.050          | nonsynonymous                                                                                                                                                                                 | KIAA1609:NM_020947:exon4:c.C516G;p.D172E                                                                                                                                                                                                                                                        | 0.01925077                                                                                  | Root_p_Firmicutes_c_Clostridia_o_Clostridiales_f_Veillonellaceae                                     |
|                                                                                           | 13        | 78216873              | rs1053985            | 3.51E-06             | 0.071          | synonymous                                                                                                                                                                                    | SECEL:NM_001160706:exon30:c.A1854G;p.L618L;SECEL:NM_003843:exon31:c.A1920G;p.L640L;SECEL:NM_144777:exon32:c.A1980G;p.L660L;FSIP2:NM_173651:exons 10, 12, 16, 17                                                                                                                                 | 0.08345806                                                                                  | Root_p_Proteobacteria                                                                                |
|                                                                                           | 2         | 186625770 - 186671912 | multiple             | 2.41E-06 (min)       | 0.1339 (max)   | syn+nonsyn                                                                                                                                                                                    |                                                                                                                                                                                                                                                                                                 | 0.019-0.037                                                                                 | Root_p_Proteobacteria_c_Gammaproteobacteria_o_Pseudomonadales_f_Moraxellaceae                        |
| Attached Keratinized gingiva                                                              | 6         | 80741243              | rs1801465            | 2.94E-06             | 0.104          | synonymous                                                                                                                                                                                    | TTK:NM_001166691:exon14:c.A1578T;p.I526I;TTK:NM_003318:exon14:c.A1581T;p.I527I                                                                                                                                                                                                                  | 0.06981808                                                                                  | Root_p_Actinobacteria_c_Actinobacteria_o_Actinomycetales_f_Actinomycetaceae_g_Actinomycetes          |
|                                                                                           | 17        | 67125840              | rs4968839            | 3.37E-07             | 0.099          | nonsynonymous                                                                                                                                                                                 | ABCA6:NM_080284:exon7:c.G844A;p.V282I                                                                                                                                                                                                                                                           | 0.008009104                                                                                 | Root_p_Bacteroidetes_c_Bacteroidia_o_Bacteroidales_f_Prevotellaceae_g_Prevotella                     |
|                                                                                           | 17        | 67212031              | rs11077414           | 9.99E-07             | 0.084          | synonymous                                                                                                                                                                                    | ABCA10:NM_080282:exon9:c.T783C;p.Y261Y                                                                                                                                                                                                                                                          | 0.01187811                                                                                  | Root_p_Bacteroidetes_c_Bacteroidia_o_Bacteroidales_f_Prevotellaceae_g_Prevotella                     |
|                                                                                           | 3         | 174814920             | rs9836841            | 4.33E-06             | 0.043          | nonsynonymous                                                                                                                                                                                 | NAALADL2:NM_207015:exon2:c.A384G;p.I128M                                                                                                                                                                                                                                                        | 0.09829463                                                                                  | Root_p_Bacteroidetes_c_Flavobacteria_o_Flavobacteriales_f_Flavobacteriaceae_g_Capnocytophaga         |
|                                                                                           | 10        | 125528048             | rs1219725            | 8.27E-06             | 0.056          | synonymous                                                                                                                                                                                    | CPXM2:NM_198148:exon9:c.C1293T;p.Y431Y                                                                                                                                                                                                                                                          | 0.09829463                                                                                  | Root_p_Bacteroidetes_c_Flavobacteria_o_Flavobacteriales_f_Flavobacteriaceae_g_Capnocytophaga         |
|                                                                                           | 9         | 104309445             | rs2273976            | 3.74E-07             | 0.096          | synonymous                                                                                                                                                                                    | RNF20:NM_019592:exon8:c.T921C;p.Y307Y                                                                                                                                                                                                                                                           | 0.008884208                                                                                 | Root_p_Firmicutes_c_Bacilli_o_Gemellales_f_Gemellaceae_g_Gemella                                     |
|                                                                                           | 16        | 81398635              | rs2608555            | 7.34E-06             | 0.042          | synonymous                                                                                                                                                                                    | GAN:NM_022041:exon8:c.C1293T;p.Y431Y                                                                                                                                                                                                                                                            | 0.0872276                                                                                   | Root_p_Firmicutes_c_Bacilli_o_Gemellales_f_Gemellaceae_g_Gemella                                     |
|                                                                                           | 2         | 228230945             | rs228230945          | 4.48E-06             | 0.187          | nonsynonymous                                                                                                                                                                                 | TM4SF20:NM_024795:exon3:c.C265T;p.L89F                                                                                                                                                                                                                                                          | 0.05329098                                                                                  | Root_p_Firmicutes_c_Bacilli_o_Lactobacillales_f_Streptococcaceae_g_Streptococcus                     |
|                                                                                           | 7         | 47840387              | rs13231277           | 4.18E-06             | 0.160          | nonsynonymous                                                                                                                                                                                 | PKD1L1:NM_138295:exon54:c.G8053A;p.A2685T                                                                                                                                                                                                                                                       | 0.05329098                                                                                  | Root_p_Firmicutes_c_Bacilli_o_Lactobacillales_f_Streptococcaceae_g_Streptococcus                     |
|                                                                                           | 1         | 159824967             | rs2501340            | 3.08E-06             | 0.088          | nonsynonymous                                                                                                                                                                                 | Clor204:NM_001134233:exon1:c.C61G;p.Q21E                                                                                                                                                                                                                                                        | 0.07317106                                                                                  | Root_p_Firmicutes_c_Clostridia_o_Clostridiales_f_Lachnospiraceae                                     |
|                                                                                           | 3         | 128344786             | rs1126828            | 1.19E-06             | 0.113          | synonymous                                                                                                                                                                                    | RPN1:NM_002950:exon7:c.C1206T;p.D402D                                                                                                                                                                                                                                                           | 0.02827442                                                                                  | Root_p_Proteobacteria_c_Gammaproteobacteria_o_Pasteurellales_f_Pasteurellaceae_g_Haemophilus         |
|                                                                                           | 22        | 30689998              | rs11089442           | 3.80E-06             | 0.117          | synonymous                                                                                                                                                                                    | TBC1D10A:NM_031937:exon7:c.C807T;p.L269L;TBC1D10A:NM_001204240:exon7:c.C828T;p.L276L;TMEM135:NM_001168724:exon7:c.G586A;p.G196R;TMEM135:NM_022918:exon8:c.G652A;p.G218R                                                                                                                         | 0.09026129                                                                                  | Root_p_Firmicutes_c_Clostridia_o_Clostridiales_f_ClostridialesFamilyXI.IncertaeSedis                 |
|                                                                                           | 11        | 87013438              | rs2276102            | 1.34E-06             | 0.001          | nonsynonymous                                                                                                                                                                                 | C17orf99:NM_001163075:exon3:c.T301C;p.W101R                                                                                                                                                                                                                                                     | 0.03183874                                                                                  | Root_p_Firmicutes_c_Clostridia_o_Clostridiales_f_Lachnospiraceae_g_Moryella                          |
| 17                                                                                        | 76157266  | rs4071641             | 4.27E-06             | 0.023                | nonsynonymous  | KLHL6:NM_130446:exon5:c.T1311C;p.N437N                                                                                                                                                        | 0.05070658                                                                                                                                                                                                                                                                                      | Root_p_Firmicutes_c_Clostridia_o_Clostridiales_f_Lachnospiraceae_g_Moryella                 |                                                                                                      |
| 3                                                                                         | 183210101 | rs1520101             | 2.38E-06             | 0.025                | synonymous     | CHRNA9:NM_017581:exon1:c.C39T;p.L13L                                                                                                                                                          | 0.05661542                                                                                                                                                                                                                                                                                      | Root_p_Proteobacteria_c_Betaproteobacteria_o_Burkholderiales_f_Burkholderiaceae_g_Lautropia |                                                                                                      |
| 4                                                                                         | 40337523  | rs6241474             | 7.33E-07             | 0.027                | synonymous     | CHRNA9:NM_017581:exon1:c.C39T;p.L13L                                                                                                                                                          | 0.01743165                                                                                                                                                                                                                                                                                      | Root_p_Proteobacteria_c_Betaproteobacteria_o_Neisseriales_f_Neisseriaceae_g_Eikenella       |                                                                                                      |
| Hard palate                                                                               | 16        | 842450                | rs2277897            | 3.70E-06             | 0.025          | synonymous                                                                                                                                                                                    | CHTF18:NM_022092:exon11:c.C1338T;p.N446N                                                                                                                                                                                                                                                        | 0.08801875                                                                                  | Root_p_Firmicutes_c_Clostridia_o_Clostridiales_f_ClostridialesFamilyXIII.IncertaeSedis_g_Eubacterium |
|                                                                                           | 19        | 10794630              | rs2229383            | 4.07E-07             | 0.201          | synonymous                                                                                                                                                                                    | ILF3:NM_012218:exon17:c.G2043T;p.S681S;ILF3:NM_001137673:exon17:c.G2055T;p.S685S;ILF3:NM_017620:exon17:c.G2055T;p.S685S;ILF3:NM_153464:exon17:c.G2043T;p.S681S;ILF3:NM_004516:exon17:c.G2043T;p.S681S                                                                                           | 0.009683965                                                                                 | Root_p_Firmicutes_c_Clostridia_o_Clostridiales_f_Veillonellaceae_g_Veillonella                       |
|                                                                                           | 4         | 41673604              | rs11734372           | 2.43E-06             | 0.083          | nonsynonymous                                                                                                                                                                                 | LIMCH1:NM_00112720:exon11:c.T1778C;p.M593T;LIMCH1:NM_00112717:exon17:c.T2276C;p.M759T;LIMCH1:NM_014988:exon17:c.T2276C;p.M759T;LIMCH1:NM_00112718:exon17:c.T2276C;p.M759T;LIMCH1:NM_00112719:exon12:c.T1814C;p.M605T                                                                            | 0.05768058                                                                                  | Root_p_Proteobacteria_c_Betaproteobacteria_o_Neisseriales_f_Neisseriaceae_g_Neisseria                |
| Left Antecubital fossa                                                                    | 1         | 92457843              | rs10747493           | 8.08E-07             | 0.015          | nonsynonymous                                                                                                                                                                                 | BRDT:NM_207189:exon14:c.C2087T;p.P696L;BRDT:NM_001242810:exon14:c.C1868T;p.P623L;BRDT:NM_001726:exon14:c.C2087T;p.P696L;BRDT:NM_001242805:exon15:c.C2087T;p.P696L;BRDT:NM_001242807:exon13:c.C1949T;p.P650L;BRDT:NM_001242808:exon13:c.C1949T;p.P650L;BRDT:NM_001242806:exon14:c.C2099T;p.P700L | 0.01921567                                                                                  | Root_p_Firmicutes_c_Clostridia_o_Clostridiales_f_Ruminococcaceae_g_Faecalibacterium                  |
|                                                                                           | 9         | 38615698              | rs1832313            | 2.15E-06             | 0.008          | nonsynonymous                                                                                                                                                                                 | ANKRD18A:NM_147195:exon3:c.G388A;p.E130K                                                                                                                                                                                                                                                        | 0.02555275                                                                                  | Root_p_Firmicutes_c_Clostridia_o_Clostridiales_f_Veillonellaceae                                     |
|                                                                                           | 15        | 100514614             | rs2573652            | 5.76E-07             | 0.010          | nonsynonymous                                                                                                                                                                                 | ADAMTS17:NM_139057:exon22:c.A3281G;p.N1094S                                                                                                                                                                                                                                                     | 0.01369865                                                                                  | Root_p_Firmicutes_c_Clostridia_o_Clostridiales_f_Veillonellaceae                                     |
|                                                                                           | 14        | 88693725              | rs2277524            | 3.11E-06             | 0.004          | synonymous                                                                                                                                                                                    | CNK10:NM_138318:exon4:c.C675G;p.V225V;CNK10:NM_021161:exon4:c.C660G;p.V220V;CNK10:NM_138318:exon4:c.C675G;p.V225V                                                                                                                                                                               | 0.07394847                                                                                  | Root_p_Fusobacteria_c_Fusobacteria_o_Fusobacteriales_f_Fusobacteriaceae_g_Fusobacterium              |
|                                                                                           | 2         | 163208893             | rs17783344           | 3.67E-06             | 0.002          | nonsynonymous                                                                                                                                                                                 | GCA:NM_012198:exon3:c.T238G;p.S80A                                                                                                                                                                                                                                                              | 0.08730721                                                                                  | Root_p_Proteobacteria_c_Alphaproteobacteria_o_Rhizobiales                                            |
| Left Retroauricular crease                                                                | 9         | 33442952              | rs2228332            | 1.19E-06             | 0.023          | synonymous                                                                                                                                                                                    | AQP3:NM_004925:exon4:c.C390T;p.F130F                                                                                                                                                                                                                                                            | 0.0283767                                                                                   | Root_p_Bacteroidetes_c_Bacteroidia_o_Bacteroidales_f_Bacteroidaceae_g_Bacteroides                    |
|                                                                                           | 1         | 111862074             | rs2820092            | 2.41E-06             | 0.114          | synonymous                                                                                                                                                                                    | CHIA:NM_201653:exon11:c.C1161T;p.L387L;CHIA:NM_021797:exon8:c.C837T;p.L279L                                                                                                                                                                                                                     | 0.05270533                                                                                  | Root_p_Firmicutes_c_Clostridia_o_Clostridiales_f_Veillonellaceae_g_Veillonella                       |
|                                                                                           | 12        | 10782115 - 10783729   | rs3759259, rs2290717 | 6.79E-06             | 0.061          | syn, nonsyn                                                                                                                                                                                   | STYK1:NM_018423:exon5, 6                                                                                                                                                                                                                                                                        | 0.097                                                                                       | Root_p_Proteobacteria_c_Gammaproteobacteria_o_Enterobacteriales_f_Enterobacteriaceae                 |
|                                                                                           | 10        | 134017295             | rs12313              | 2.54E-06             | 0.068          | synonymous                                                                                                                                                                                    | DPYSL4:NM_006426:exon13:c.A1491G;p.G497G                                                                                                                                                                                                                                                        | 0.06029751                                                                                  | Root_p_Proteobacteria_c_Gammaproteobacteria_o_Pseudomonadales_f_Moraxellaceae                        |
|                                                                                           | 17        | 78073355              | rs56407805           | 2.92E-06             | 0.122          | synonymous                                                                                                                                                                                    | CCDC40:NM_017950:exon20:c.A3210G;p.T1070T                                                                                                                                                                                                                                                       | 0.06950309                                                                                  | Root_p_Bacteroidetes_c_Bacteroidia_o_Bacteroidales_f_Prevotellaceae_g_Prevotella                     |
| Right Retroauricular crease                                                               | 1         | 169512027             | rs6021               | 1.51E-06             | 0.103          | synonymous                                                                                                                                                                                    | FS:NM_000130:exon13:c.A2301G;p.S767S                                                                                                                                                                                                                                                            | 0.03599989                                                                                  | Root_p_Proteobacteria_c_Gammaproteobacteria_o_Pasteurellales_f_Pasteurellaceae                       |
|                                                                                           | 4         | 155241872             | rs11935573           | 2.52E-06             | 0.027          | nonsynonymous                                                                                                                                                                                 | DCHS2:NM_017639:exon14:c.C3614T;p.S1205L                                                                                                                                                                                                                                                        | 0.06001567                                                                                  | Root_p_TM7_c_TM7-3                                                                                   |
|                                                                                           | 6         | 34831566              | rs3734264            | 7.71E-07             | 0.103          | synonymous                                                                                                                                                                                    | UHRF1BP1:NM_010754:exon15:c.G330A;p.T1101T                                                                                                                                                                                                                                                      | 0.01834216                                                                                  | Root_p_Firmicutes_c_Bacilli_o_Lactobacillales_f_Carnobacteriaceae_g_Granulicatella                   |
| Saliva                                                                                    | 1         | 223116240             | rs61746477           | 3.56E-07             | 0.168          | synonymous                                                                                                                                                                                    | DISP1:NM_032890:exon4:c.G75A;p.P25P                                                                                                                                                                                                                                                             | 0.008468172                                                                                 | Root_p_Proteobacteria_c_Gammaproteobacteria_o_Pseudomonadales_f_Moraxellaceae                        |
|                                                                                           | 17        | 40714804              | rs615942             | 3.14E-07             | 0.038          | nonsynonymous                                                                                                                                                                                 | COASY:NM_001042529:exon2:c.C164A;p.S55Y;COASY:NM_025233:exon1:c.C164A;p.S55Y;COASY:NM_001042532:exon3:c.C251A;p.S84Y;COASY:NM_001042530:exon2:c.C164A;p.S55Y                                                                                                                                    | 0.007458662                                                                                 | Root_p_Bacteroidetes_c_Bacteroidia_o_Bacteroidales_f_Porphyrionadaceae_g_Porphyrionomas              |
| Subgingival plaque                                                                        | 10        | 64927823              | rs1935               | 1.98E-06             | 0.195          | nonsynonymous                                                                                                                                                                                 | JMJD1C:NM_004241:exon23:c.G6894C;p.E2298D;JMJD1C:NM_032776:exon26:c.G7605C;p.E2535D                                                                                                                                                                                                             | 0.0469734                                                                                   | Root_p_Firmicutes_c_Clostridia_o_Clostridiales_f_Ruminococcaceae                                     |
|                                                                                           | 15        | 43632549              | rs2278857            | 8.67E-06             | 0.058          | synonymous                                                                                                                                                                                    | ADAL:NM_001159280:exon7:c.T342C;p.T114T;ADAL:NM_001012969:exon6:c.T342C;p.T114T                                                                                                                                                                                                                 | 0.06876747                                                                                  | Root_p_Fusobacteria_c_Fusobacteria_o_Fusobacteriales_f_Fusobacteriaceae_g_Leptotrichia               |
|                                                                                           | 15        | 43661802              | rs3809482            | 1.04E-06             | 0.104          | nonsynonymous                                                                                                                                                                                 | ZSCAN29:NM_152455:exon1:c.A310G;p.R104G                                                                                                                                                                                                                                                         | 0.02475914                                                                                  | Root_p_Fusobacteria_c_Fusobacteria_o_Fusobacteriales_f_Fusobacteriaceae_g_Leptotrichia               |
|                                                                                           | 15        | 43748304              | rs690367             | 6.95E-06             | 0.067          | synonymous                                                                                                                                                                                    | TP53BP1:NM_005657:exon12:c.T2487C;p.D829D;TP53BP1:NM_001141979:exon12:c.T2502C;p.D834D;TP53BP1:NM_001141980:exon12:c.T2502C;p.D834D                                                                                                                                                             | 0.06876747                                                                                  | Root_p_Fusobacteria_c_Fusobacteria_o_Fusobacteriales_f_Fusobacteriaceae_g_Leptotrichia               |
|                                                                                           | 2         | 136511817             | rs1050115            | 6.51E-06             | 0.027          | synonymous                                                                                                                                                                                    | UBXN4:NM_014607:exon4:c.A303G;p.E101E                                                                                                                                                                                                                                                           | 0.07742343                                                                                  | Root_p_Actinobacteria_c_Actinobacteria_o_Bifidobacteriales_f_Bifidobacteriaceae_g_Bifidobacterium    |
| Supragingival plaque                                                                      | 2         | 136561557             | rs2304371            | 4.14E-06             | 0.025          | synonymous                                                                                                                                                                                    | LCT:NM_002299:exon11:c.C4606T;p.L1536L                                                                                                                                                                                                                                                          | 0.07742343                                                                                  | Root_p_Actinobacteria_c_Actinobacteria_o_Bifidobacteriales_f_Bifidobacteriaceae_g_Bifidobacterium    |
|                                                                                           | 2         | 136590746             | rs3754689            | 1.16E-05             | 0.033          | nonsynonymous                                                                                                                                                                                 | LCT:NM_002299:exon2:c.G655A;p.V219I                                                                                                                                                                                                                                                             | 0.09173467                                                                                  | Root_p_Actinobacteria_c_Actinobacteria_o_Bifidobacteriales_f_Bifidobacteriaceae_g_Bifidobacterium    |
|                                                                                           | 3         | 129297223             | rs1110168            | 6.92E-06             | 0.039          | synonymous                                                                                                                                                                                    | PLXND1:NM_015103:exon9:c.G2295C;p.T765T                                                                                                                                                                                                                                                         | 0.05488223                                                                                  | Root_p_Bacteroidetes_c_Bacteroidia_o_Bacteroidales_f_Prevotellaceae_g_Prevotella                     |
|                                                                                           | 11        | 57982620              | rs1966834            | 4.52E-06             | 0.039          | nonsynonymous                                                                                                                                                                                 | OR1S1:NM_001004458:exon1:c.A404G;p.H135R                                                                                                                                                                                                                                                        | 0.05488223                                                                                  | Root_p_Bacteroidetes_c_Bacteroidia_o_Bacteroidales_f_Prevotellaceae_g_Prevotella                     |
|                                                                                           | 14        | 55907172              | rs8019270            | 5.84E-06             | 0.040          | nonsynonymous                                                                                                                                                                                 | TBPL2:NM_199047:exon1:c.G92C;p.R31P                                                                                                                                                                                                                                                             | 0.05488223                                                                                  | Root_p_Bacteroidetes_c_Bacteroidia_o_Bacteroidales_f_Prevotellaceae_g_Prevotella                     |
|                                                                                           | 20        | 2816821               | rs2274669            | 1.49E-06             | 0.065          | synonymous                                                                                                                                                                                    | FAM113A:NM_002760:exon7:c.G981A;p.P327P                                                                                                                                                                                                                                                         | 0.03546493                                                                                  | Root_p_Bacteroidetes_c_Bacteroidia_o_Bacteroidales_f_Rikenellaceae_g_Alistipes                       |
|                                                                                           | 7         | 37961001              | rs10248138           | 1.34E-06             | 0.096          | synonymous                                                                                                                                                                                    | EPDR1:NM_001242948:exon1:c.C34A;p.R12R                                                                                                                                                                                                                                                          | 0.01384945                                                                                  | Root_p_Firmicutes_c_Clostridia_o_Clostridiales_f_Lachnospiraceae_g_Lachnospiraceae                   |
|                                                                                           | 10        | 73111408              | rs780668             | 3.38E-06             | 0.048          | nonsynonymous                                                                                                                                                                                 | SLC29A3:NM_018344:exon4:c.C473T;p.S158F;SLC29A3:NM_001174098:exon4:c.C473T;p.S158F                                                                                                                                                                                                              | 0.08029831                                                                                  | Root_p_Firmicutes_c_Clostridia_o_Clostridiales_f_ClostridialesFamilyXI.IncertaeSedis                 |
|                                                                                           | 2         | 216300482             | rs1250259            | 2.89E-06             | 0.123          | nonsynonymous                                                                                                                                                                                 | FN1:NM_212476:exon1:c.A44T;p.Q15L;FN1:NM_212478:exon1:c.A44T;p.Q15L;FN1:NM_002026:exon1:c.A44T;p.Q15L;FN1:NM_054034:exon1:c.A44T;p.Q15L;FN1:NM_212474:exon1:c.A44T;p.Q15L;FN1:NM_212482:exon1:c.A44T;p.Q15L                                                                                     | 0.06869464                                                                                  | Root_p_Firmicutes_c_Clostridia_o_Clostridiales_f_ClostridialesFamilyXIII.IncertaeSedis               |
|                                                                                           | 5         | 41049389              | rs325863             | 1.19E-06             | 0.007          | synonymous                                                                                                                                                                                    | HEATR7B2:NM_173489:exon14:c.A1494G;p.T498T                                                                                                                                                                                                                                                      | 0.01418358                                                                                  | Root_p_Fusobacteria_c_Fusobacteria_o_Fusobacteriales_f_Fusobacteriaceae_g_Fusobacterium              |
|                                                                                           | 5         | 41049397              | rs325864             | 1.19E-06             | 0.007          | nonsynonymous                                                                                                                                                                                 | HEATR7B2:NM_173489:exon14:c.G1486A;p.V496I                                                                                                                                                                                                                                                      | 0.01418358                                                                                  | Root_p_Fusobacteria_c_Fusobacteria_o_Fusobacteriales_f_Fusobacteriaceae_g_Fusobacterium              |
|                                                                                           | 15        | 100821576             | rs7496668            | 3.93E-06             | 0.091          | nonsynonymous                                                                                                                                                                                 | ADAMTS17:NM_139057:exon4:c.C647T;p.S216L                                                                                                                                                                                                                                                        | 0.09343594                                                                                  | Root_p_Bacteroidetes_c_Bacteroidia_o_Bacteroidales_f_Porphyrionadaceae_g_Porphyrionomas              |
|                                                                                           | 5         | 15066447              | rs369907             | 1.08E-06             | 0.001          | synonymous                                                                                                                                                                                    | SLC36A2:NM_181776:exon10:c.G1383A;p.Q461Q                                                                                                                                                                                                                                                       | 0.02559921                                                                                  | Root_p_Bacteroidetes_c_Bacteroidia_o_Bacteroidales_f_Porphyrionadaceae_g_Tannerella                  |
| 10                                                                                        | 96954360  | rs11188225            | 6.82E-06             | 0.089                | nonsynonymous  | C10orf129:NM_207321:exon2:c.T118A;p.C40S                                                                                                                                                      | 0.05406655                                                                                                                                                                                                                                                                                      | Root_p_Bacteroidetes_c_Bacteroidia_o_Bacteroidales_f_Porphyrionadaceae_g_Tannerella         |                                                                                                      |
| 11                                                                                        | 124096247 | rs2466613             | 2.17E-06             | 0.004                | nonsynonymous  | OR8G2:NM_001007249:exon1:c.G850A;p.G284R                                                                                                                                                      | 0.02578936                                                                                                                                                                                                                                                                                      | Root_p_Bacteroidetes_c_Bacteroidia_o_Bacteroidales_f_Porphyrionadaceae_g_Tannerella         |                                                                                                      |
| 3                                                                                         | 52556890  | rs4434138             | 9.53E-06             | 0.150                | nonsynonymous  | STAB1:NM_015136:exon62:c.A6844G;p.I2282V                                                                                                                                                      | 0.06613724                                                                                                                                                                                                                                                                                      | Root_p_Firmicutes_c_Bacilli_o_Lactobacillales_f_Streptococcaceae_g_Streptococcus            |                                                                                                      |
| 3                                                                                         | 52558133  | rs13621               | 1.11E-05             | 0.142                | synonymous     | STAB1:NM_015136:exon68:c.T7560C;p.D2520D                                                                                                                                                      | 0.06613724                                                                                                                                                                                                                                                                                      | Root_p_Firmicutes_c_Bacilli_o_Lactobacillales_f_Streptococcaceae_g_Streptococcus            |                                                                                                      |
| 3                                                                                         | 52584787  | rs2251219             | 7.98E-06             | 0.151                | nonsynonymous  | PBRM1:NM_018313:exon28:c.A4353G;p.P1445P                                                                                                                                                      | 0.06613724                                                                                                                                                                                                                                                                                      | Root_p_Firmicutes_c_Bacilli_o_Lactobacillales_f_Streptococcaceae_g_Streptococcus            |                                                                                                      |
| 3                                                                                         | 52820981  | rs678                 | 1.40E-05             | 0.131                | nonsynonymous  | ITIH1:NM_001166436:exon12:c.A1328T;p.E443V;ITIH1:NM_001166435:exon10:c.A890T;p.E297V;ITIH1:NM_001166436:exon10:c.A890T;p.E297V;ITIH1:NM_002215:exon14:c.A1754T;p.E585V                        | 0.06641059                                                                                                                                                                                                                                                                                      | Root_p_Firmicutes_c_Bacilli_o_Lactobacillales_f_Streptococcaceae_g_Streptococcus            |                                                                                                      |
| 3                                                                                         | 52821011  | rs1042779             | 4.46E-06             | 0.144                | nonsynonymous  | ITIH1:NM_001166436:exon12:c.A1358G;p.Q453R;ITIH1:NM_001166435:exon10:c.A920G;p.Q307R;ITIH1:NM_001166436:exon10:c.A920G;p.Q307R;ITIH1:NM_002215:exon14:c.A1784G;p.Q595R                        | 0.06613724                                                                                                                                                                                                                                                                                      | Root_p_Firmicutes_c_Bacilli_o_Lactobacillales_f_Streptococcaceae_g_Streptococcus            |                                                                                                      |
| 1                                                                                         | 231906589 | rs2492367             | 5.80E-06             | 0.063                | synonymous     | DISC1:NM_001164539:exon6:c.C1407T;p.I469I;DISC1:NM_001164537:exon7:c.C1503T;p.I501I;DISC1:NM_001164548:exon6:c.C1407T;p.I469I;DISC1:NM_001164541:exon6:c.C1407T;p.I469I;DISC1:NM_001164544:ex |                                                                                                                                                                                                                                                                                                 |                                                                                             |                                                                                                      |



**Table S6.** Diseases and functional annotations enriched among genes with coding SNPs that are correlated with bacterial taxa abundance.

| Category                                              | Diseases or Functions Annotation              | P-Value  | Molecules                                                                                                                                                                                                                                                                                                                                               | # Molecules |
|-------------------------------------------------------|-----------------------------------------------|----------|---------------------------------------------------------------------------------------------------------------------------------------------------------------------------------------------------------------------------------------------------------------------------------------------------------------------------------------------------------|-------------|
| Cancer                                                | melanoma                                      | 1.41E-05 | ABCA10,ABCA6,ADAMTS17,ANKRD18A,B4GALNT3,BRDT,C10orf129,CCDC40,CHIA,CHRNA9,CPXM2,DCHS2,DISC1,DISP1,F5,FN1,FSIP2,GOLGA5,HLA-DRA,ILF3,ITIH1,JMJD1C,KCNK10,KLHL6,LCT,LIMCH1,MKI67,MROH2B,NAALADL2,NDNF,PKD1L1,PLXND1,RNF20,RPN1,SLC36A2,STAB1,STYK1,TBC1D10A,TLDC1,TLR1,TMEM135,TP53BP1,TTK,UBXN4,ZSCAN29                                                   | 45          |
| Cellular Movement                                     | transendothelial migration of lymphocytes     | 8.75E-05 | AQP3,FN1,STAB1                                                                                                                                                                                                                                                                                                                                          | 3           |
| Hematological System Development and Function         | transendothelial migration of lymphocytes     | 8.75E-05 | AQP3,FN1,STAB1                                                                                                                                                                                                                                                                                                                                          | 3           |
| Immune Cell Trafficking                               | transendothelial migration of lymphocytes     | 8.75E-05 | AQP3,FN1,STAB1                                                                                                                                                                                                                                                                                                                                          | 3           |
| Cellular Movement                                     | migration of pyramidal neurons                | 1.09E-04 | DISC1,FN1                                                                                                                                                                                                                                                                                                                                               | 2           |
| Nervous System Development and Function               | migration of pyramidal neurons                | 1.09E-04 | DISC1,FN1                                                                                                                                                                                                                                                                                                                                               | 2           |
| Tissue Morphology                                     | lack of blood island                          | 8.36E-04 | F5,FN1                                                                                                                                                                                                                                                                                                                                                  | 2           |
| Dermatological Diseases and Conditions                | psoriasisform dermatitis                      | 9.74E-04 | FN1,MKI67                                                                                                                                                                                                                                                                                                                                               | 2           |
| Inflammatory Disease                                  | psoriasisform dermatitis                      | 9.74E-04 | FN1,MKI67                                                                                                                                                                                                                                                                                                                                               | 2           |
| Cellular Movement                                     | transendothelial migration of T lymphocytes   | 2.01E-03 | AQP3,STAB1                                                                                                                                                                                                                                                                                                                                              | 2           |
| Hematological System Development and Function         | transendothelial migration of T lymphocytes   | 2.01E-03 | AQP3,STAB1                                                                                                                                                                                                                                                                                                                                              | 2           |
| Immune Cell Trafficking                               | transendothelial migration of T lymphocytes   | 2.01E-03 | AQP3,STAB1                                                                                                                                                                                                                                                                                                                                              | 2           |
| Cell-mediated Immune Response                         | transendothelial migration of T lymphocytes   | 2.01E-03 | AQP3,STAB1                                                                                                                                                                                                                                                                                                                                              | 2           |
| Inflammatory Disease                                  | Meningitis                                    | 2.89E-03 | F5,TLR1                                                                                                                                                                                                                                                                                                                                                 | 2           |
| Neurological Disease                                  | Meningitis                                    | 2.89E-03 | F5,TLR1                                                                                                                                                                                                                                                                                                                                                 | 2           |
| Cancer                                                | growth of mammary tumor                       | 5.65E-03 | ILF3,MKI67,TP53BP1                                                                                                                                                                                                                                                                                                                                      | 3           |
| Organismal Injury and Abnormalities                   | growth of mammary tumor                       | 5.65E-03 | ILF3,MKI67,TP53BP1                                                                                                                                                                                                                                                                                                                                      | 3           |
| Reproductive System Disease                           | growth of mammary tumor                       | 5.65E-03 | ILF3,MKI67,TP53BP1                                                                                                                                                                                                                                                                                                                                      | 3           |
| Gastrointestinal Disease                              | Sjogren's syndrome                            | 5.80E-03 | FN1,MKI67,TLR1                                                                                                                                                                                                                                                                                                                                          | 3           |
| Ophthalmic Disease                                    | Sjogren's syndrome                            | 5.80E-03 | FN1,MKI67,TLR1                                                                                                                                                                                                                                                                                                                                          | 3           |
| Immunological Disease                                 | Sjogren's syndrome                            | 5.80E-03 | FN1,MKI67,TLR1                                                                                                                                                                                                                                                                                                                                          | 3           |
| Cardiovascular System Development and Function        | binding of endothelial cells                  | 5.80E-03 | F5,FN1,STAB1                                                                                                                                                                                                                                                                                                                                            | 3           |
| Cell-To-Cell Signaling and Interaction                | binding of endothelial cells                  | 5.80E-03 | F5,FN1,STAB1                                                                                                                                                                                                                                                                                                                                            | 3           |
| Tissue Morphology                                     | abnormal morphology of vascular smooth muscle | 6.09E-03 | FN1,PLXND1                                                                                                                                                                                                                                                                                                                                              | 2           |
| Cardiovascular System Development and Function        | abnormal morphology of vascular smooth muscle | 6.09E-03 | FN1,PLXND1                                                                                                                                                                                                                                                                                                                                              | 2           |
| Lymphoid Tissue Structure and Development             | abnormal morphology of vascular smooth muscle | 6.09E-03 | FN1,PLXND1                                                                                                                                                                                                                                                                                                                                              | 2           |
| Organ Morphology                                      | abnormal morphology of vascular smooth muscle | 6.09E-03 | FN1,PLXND1                                                                                                                                                                                                                                                                                                                                              | 2           |
| Organismal Development                                | abnormal morphology of vascular smooth muscle | 6.09E-03 | FN1,PLXND1                                                                                                                                                                                                                                                                                                                                              | 2           |
| Skeletal and Muscular System Development and Function | abnormal morphology of vascular smooth muscle | 6.09E-03 | FN1,PLXND1                                                                                                                                                                                                                                                                                                                                              | 2           |
| Cancer                                                | Cancer                                        | 8.23E-03 | ABCA10,ABCA6,ADAMTS17,ANKRD18A,AQP3,B4GALNT3,BRDT,C10orf129,CCDC40,CHIA,CHRNA9,CPXM2,DACT2,DCHS2,DISC1,DISP1,ESRRA,F5,FN1,FSIP2,GAN,GOLGA5,HLA-DRA,ILF3,ITIH1,JMJD1C,KCNK10,KLHL6,LCT,LIMCH1,MKI67,MROH2B,NAALADL2,NDNF,NSUN2,OR1S1,PBRM1,PKD1L1,PLXND1,RNF20,RPN1,SCEL,SLC36A2,STAB1,STYK1,TBC1D10A,TBPL2,TLDC1,TLR1,TMEM135,TP53BP1,TTK,UBXN4,ZSCAN29 | 54          |
| Cell Death and Survival                               | cell viability of embryonic cells             | 9.91E-03 | FN1,TP53BP1                                                                                                                                                                                                                                                                                                                                             | 2           |
| Embryonic Development                                 | cell viability of embryonic cells             | 9.91E-03 | FN1,TP53BP1                                                                                                                                                                                                                                                                                                                                             | 2           |
| Cell-To-Cell Signaling and Interaction                | adhesion of kidney cell lines                 | 1.08E-02 | FN1,PLXND1                                                                                                                                                                                                                                                                                                                                              | 2           |
| Tissue Development                                    | adhesion of kidney cell lines                 | 1.08E-02 | FN1,PLXND1                                                                                                                                                                                                                                                                                                                                              | 2           |
| Renal and Urological System Development and Function  | adhesion of kidney cell lines                 | 1.08E-02 | FN1,PLXND1                                                                                                                                                                                                                                                                                                                                              | 2           |
| Hematological System Development and Function         | binding of blood platelets                    | 1.17E-02 | F5,FN1                                                                                                                                                                                                                                                                                                                                                  | 2           |
| Cell-To-Cell Signaling and Interaction                | binding of blood platelets                    | 1.17E-02 | F5,FN1                                                                                                                                                                                                                                                                                                                                                  | 2           |
| Inflammatory Response                                 | binding of blood platelets                    | 1.17E-02 | F5,FN1                                                                                                                                                                                                                                                                                                                                                  | 2           |
| Cancer                                                | endocrine gland tumor                         | 1.18E-02 | DPYSL4,ESRRA,FN1,GOLGA5,HLA-DRA,MKI67                                                                                                                                                                                                                                                                                                                   | 6           |
| Cellular Development                                  | differentiation of keratinocytes              | 1.36E-02 | AQP3,FN1,SCEL                                                                                                                                                                                                                                                                                                                                           | 3           |
| Hair and Skin Development and Function                | differentiation of keratinocytes              | 1.36E-02 | AQP3,FN1,SCEL                                                                                                                                                                                                                                                                                                                                           | 3           |
| Carbohydrate Metabolism                               | release of carbohydrate                       | 1.41E-02 | ESRRA,FN1                                                                                                                                                                                                                                                                                                                                               | 2           |
| Cell-To-Cell Signaling and Interaction                | adhesion of fibroblast cell lines             | 1.61E-02 | FN1,PLXND1                                                                                                                                                                                                                                                                                                                                              | 2           |
| Connective Tissue Development and Function            | adhesion of fibroblast cell lines             | 1.61E-02 | FN1,PLXND1                                                                                                                                                                                                                                                                                                                                              | 2           |
| Tissue Development                                    | adhesion of fibroblast cell lines             | 1.61E-02 | FN1,PLXND1                                                                                                                                                                                                                                                                                                                                              | 2           |
| Cardiovascular System Development and Function        | binding of vascular endothelial cells         | 1.61E-02 | FN1,STAB1                                                                                                                                                                                                                                                                                                                                               | 2           |
| Cell-To-Cell Signaling and Interaction                | binding of vascular endothelial cells         | 1.61E-02 | FN1,STAB1                                                                                                                                                                                                                                                                                                                                               | 2           |
| Cellular Movement                                     | migration of vascular endothelial cells       | 1.64E-02 | FN1,PLXND1,STAB1                                                                                                                                                                                                                                                                                                                                        | 3           |
| Cardiovascular System Development and Function        | migration of vascular endothelial cells       | 1.64E-02 | FN1,PLXND1,STAB1                                                                                                                                                                                                                                                                                                                                        | 3           |
| Cancer                                                | gastrointestinal adenocarcinoma               | 1.76E-02 | ABCA6,DACT2,ESRRA,F5,FN1,GAN,JMJD1C,KCNK10,LCT,LIMCH1,MKI67,NSUN2,PKD1L1,RPN1,SCEL,STAB1,STYK1,TP53BP1,TTK                                                                                                                                                                                                                                              | 19          |
| Gastrointestinal Disease                              | gastrointestinal adenocarcinoma               | 1.76E-02 | ABCA6,DACT2,ESRRA,F5,FN1,GAN,JMJD1C,KCNK10,LCT,LIMCH1,MKI67,NSUN2,PKD1L1,RPN1,SCEL,STAB1,STYK1,TP53BP1,TTK                                                                                                                                                                                                                                              | 19          |
| Cancer                                                | adenocarcinoma                                | 1.89E-02 | ABCA10,ABCA6,BRDT,CCDC40,CHRNA9,DACT2,DISC1,ESRRA,F5,FN1,GAN,GOLGA5,HLA-DRA,JMJD1C,KCNK10,LCT,LIMCH1,MKI67,MROH2B,NSUN2,OR1S1,PBRM1,PKD1L1,RNF20,RPN1,SCEL,SLC36A2,STAB1,STYK1,TLR1,TP53BP1,TTK,ZSCAN29                                                                                                                                                 | 33          |
| Nervous System Development and Function               | morphology of neurites                        | 1.93E-02 | DISC1,DPYSL4,GAN                                                                                                                                                                                                                                                                                                                                        | 3           |
| Tissue Morphology                                     | morphology of neurites                        | 1.93E-02 | DISC1,DPYSL4,GAN                                                                                                                                                                                                                                                                                                                                        | 3           |
| Cell Morphology                                       | morphology of neurites                        | 1.93E-02 | DISC1,DPYSL4,GAN                                                                                                                                                                                                                                                                                                                                        | 3           |
| Cardiovascular Disease                                | Heart Disease                                 | 2.52E-02 | CHRNA9,DISP1,ESRRA,F5,FN1,PKD1L1,PLXND1,RNF20,STAB1                                                                                                                                                                                                                                                                                                     | 9           |
| Cardiovascular Disease                                | congenital heart disease                      | 2.54E-02 | PKD1L1,PLXND1,RNF20                                                                                                                                                                                                                                                                                                                                     | 3           |
| Developmental Disorder                                | congenital heart disease                      | 2.54E-02 | PKD1L1,PLXND1,RNF20                                                                                                                                                                                                                                                                                                                                     | 3           |
| Cellular Movement                                     | transmigration of phagocytes                  | 2.54E-02 | FN1,STAB1                                                                                                                                                                                                                                                                                                                                               | 2           |
| Hematological System Development and Function         | transmigration of phagocytes                  | 2.54E-02 | FN1,STAB1                                                                                                                                                                                                                                                                                                                                               | 2           |
| Immune Cell Trafficking                               | transmigration of phagocytes                  | 2.54E-02 | FN1,STAB1                                                                                                                                                                                                                                                                                                                                               | 2           |
| Inflammatory Response                                 | transmigration of phagocytes                  | 2.54E-02 | FN1,STAB1                                                                                                                                                                                                                                                                                                                                               | 2           |
| Cancer                                                | colon adenocarcinoma                          | 2.56E-02 | DACT2,ESRRA,F5,FN1,GAN,JMJD1C,KCNK10,LCT,LIMCH1,MKI67,NSUN2,PKD1L1,RPN1,SCEL,STAB1,STYK1,TP53BP1,TTK                                                                                                                                                                                                                                                    | 18          |
| Gastrointestinal Disease                              | colon adenocarcinoma                          | 2.56E-02 | DACT2,ESRRA,F5,FN1,GAN,JMJD1C,KCNK10,LCT,LIMCH1,MKI67,NSUN2,PKD1L1,RPN1,SCEL,STAB1,STYK1,TP53BP1,TTK                                                                                                                                                                                                                                                    | 18          |
| Infectious Disease                                    | flu                                           | 2.67E-02 | FN1,PLXND1                                                                                                                                                                                                                                                                                                                                              | 2           |
| Cellular Movement                                     | innervation of neurons                        | 2.87E-02 | CHRNA9,GAN                                                                                                                                                                                                                                                                                                                                              | 2           |
| Nervous System Development and Function               | innervation of neurons                        | 2.87E-02 | CHRNA9,GAN                                                                                                                                                                                                                                                                                                                                              | 2           |
| Cell Morphology                                       | innervation of neurons                        | 2.87E-02 | CHRNA9,GAN                                                                                                                                                                                                                                                                                                                                              | 2           |
| Cancer                                                | proliferation of mammary tumor cells          | 2.87E-02 | MKI67,TP53BP1                                                                                                                                                                                                                                                                                                                                           | 2           |
| Cellular Development                                  | proliferation of mammary tumor cells          | 2.87E-02 | MKI67,TP53BP1                                                                                                                                                                                                                                                                                                                                           | 2           |
| Cellular Growth and Proliferation                     | proliferation of mammary tumor cells          | 2.87E-02 | MKI67,TP53BP1                                                                                                                                                                                                                                                                                                                                           | 2           |
| Organismal Injury and Abnormalities                   | proliferation of mammary tumor cells          | 2.87E-02 | MKI67,TP53BP1                                                                                                                                                                                                                                                                                                                                           | 2           |
| Reproductive System Disease                           | proliferation of mammary tumor cells          | 2.87E-02 | MKI67,TP53BP1                                                                                                                                                                                                                                                                                                                                           | 2           |
| Tumor Morphology                                      | proliferation of mammary tumor cells          | 2.87E-02 | MKI67,TP53BP1                                                                                                                                                                                                                                                                                                                                           | 2           |
| Cancer                                                | gastric carcinoma                             | 2.89E-02 | ABCA6,MKI67,TTK                                                                                                                                                                                                                                                                                                                                         | 3           |
| Gastrointestinal Disease                              | gastric carcinoma                             | 2.89E-02 | ABCA6,MKI67,TTK                                                                                                                                                                                                                                                                                                                                         | 3           |
| Cancer                                                | head and neck tumor                           | 2.93E-02 | CPXM2,DPYSL4,ESRRA,F5,FN1,GOLGA5,MKI67,RNF20                                                                                                                                                                                                                                                                                                            | 8           |
| Tissue Development                                    | adhesion of extracellular matrix              | 2.94E-02 | FN1,PLXND1                                                                                                                                                                                                                                                                                                                                              | 2           |
| Cellular Assembly and Organization                    | retraction of cellular protrusions            | 3.00E-02 | FN1,PLXND1                                                                                                                                                                                                                                                                                                                                              | 2           |
| Cellular Compromise                                   | retraction of cellular protrusions            | 3.00E-02 | FN1,PLXND1                                                                                                                                                                                                                                                                                                                                              | 2           |
| Cardiovascular Disease                                | ischemic cardiomyopathy                       | 3.07E-02 | CHRNA9,F5                                                                                                                                                                                                                                                                                                                                               | 2           |
| Nervous System Development and Function               | morphology of dendrites                       | 3.07E-02 | DISC1,DPYSL4                                                                                                                                                                                                                                                                                                                                            | 2           |
| Tissue Morphology                                     | morphology of dendrites                       | 3.07E-02 | DISC1,DPYSL4                                                                                                                                                                                                                                                                                                                                            | 2           |
| Cell Morphology                                       | morphology of dendrites                       | 3.07E-02 | DISC1,DPYSL4                                                                                                                                                                                                                                                                                                                                            | 2           |
| Cancer                                                | thyroid cancer                                | 3.32E-02 | ESRRA,FN1,GOLGA5                                                                                                                                                                                                                                                                                                                                        | 3           |
| Endocrine System Disorders                            | thyroid cancer                                | 3.32E-02 | ESRRA,FN1,GOLGA5                                                                                                                                                                                                                                                                                                                                        | 3           |
| Cellular Movement                                     | migration of macrophages                      | 3.35E-02 | PLXND1,STAB1                                                                                                                                                                                                                                                                                                                                            | 2           |
| Hematological System Development and Function         | migration of macrophages                      | 3.35E-02 | PLXND1,STAB1                                                                                                                                                                                                                                                                                                                                            | 2           |
| Immune Cell Trafficking                               | migration of macrophages                      | 3.35E-02 | PLXND1,STAB1                                                                                                                                                                                                                                                                                                                                            | 2           |
| Inflammatory Response                                 | migration of macrophages                      | 3.35E-02 | PLXND1,STAB1                                                                                                                                                                                                                                                                                                                                            | 2           |
| Dermatological Diseases and Conditions                | leprosy                                       | 3.43E-02 | ILF3,TLR1                                                                                                                                                                                                                                                                                                                                               | 2           |
| Infectious Disease                                    | leprosy                                       | 3.43E-02 | ILF3,TLR1                                                                                                                                                                                                                                                                                                                                               | 2           |
| Inflammatory Disease                                  | polyarticular juvenile rheumatoid arthritis   | 3.43E-02 | HLA-DRA,TLR1                                                                                                                                                                                                                                                                                                                                            | 2           |
| Connective Tissue Disorders                           | polyarticular juvenile rheumatoid arthritis   | 3.43E-02 | HLA-DRA,TLR1                                                                                                                                                                                                                                                                                                                                            | 2           |
| Skeletal and Muscular Disorders                       | polyarticular juvenile rheumatoid arthritis   | 3.43E-02 | HLA-DRA,TLR1                                                                                                                                                                                                                                                                                                                                            | 2           |
| Immunological Disease                                 | polyarticular juvenile rheumatoid arthritis   | 3.43E-02 | HLA-DRA,TLR1                                                                                                                                                                                                                                                                                                                                            | 2           |
| Cellular Assembly and Organization                    | quantity of plasma membrane projections       | 3.50E-02 | DPYSL4,FN1                                                                                                                                                                                                                                                                                                                                              | 2           |
| Cellular Function and Maintenance                     | quantity of plasma membrane projections       | 3.50E-02 | DPYSL4,FN1                                                                                                                                                                                                                                                                                                                                              | 2           |
| Nervous System Development and Function               | abnormal morphology of ventral root           | 3.61E-02 | GAN                                                                                                                                                                                                                                                                                                                                                     | 1           |
| Cancer                                                | colon cancer                                  | 3.63E-02 | AQP3,DACT2,ESRRA,F5,FN1,GAN,JMJD1C,KCNK10,LCT,LIMCH1,MKI67,NSUN2,PKD1L1,RPN1,SCEL,STAB1,STYK1,TP53BP1,TTK                                                                                                                                                                                                                                               | 19          |
| Gastrointestinal Disease                              | colon cancer                                  | 3.63E-02 | AQP3,DACT2,ESRRA,F5,FN1,GAN,JMJD1C,KCNK10,LCT,LIMCH1,MKI67,NSUN2,PKD1L1,RPN1,SCEL,STAB1,STYK1,TP53BP1,TTK                                                                                                                                                                                                                                               | 19          |
| Cancer                                                | head and neck cancer                          | 3.69E-02 | CPXM2,ESRRA,F5,FN1,GOLGA5,MKI67,RNF20                                                                                                                                                                                                                                                                                                                   | 7           |
| Cancer                                                | epithelial neoplasia                          | 3.97E-02 | ABCA10,ABCA6,BRDT,CCDC40,CHRNA9,CPXM2,DACT2,DCHS2,DISC1,DPYSL4,ESRRA,F5,FN1,GAN,GOLGA5,HLA-DRA,JMJD1C,KCNK10,LCT,LIMCH1,MKI67,MROH2B,NAALADL2,NSUN2,OR1S1,PBRM1,PKD1L1,RNF20,RPN1,SCEL,SLC36A2,STAB1,STYK1,TBPL2,TLR1,TP53BP1,TTK,ZSCAN29                                                                                                               | 38          |
| Tissue Morphology                                     | abnormal morphology of pericardium            | 4.02E-02 | DISP1,FN1                                                                                                                                                                                                                                                                                                                                               | 2           |
| Cardiovascular System Development and Function        | abnormal morphology of pericardium            | 4.02E-02 | DISP1,FN1                                                                                                                                                                                                                                                                                                                                               | 2           |
| Organ Morphology                                      | abnormal morphology of pericardium            | 4.02E-02 | DISP1,FN1                                                                                                                                                                                                                                                                                                                                               | 2           |
| Organismal Development                                | abnormal morphology of pericardium            | 4.02E-02 | DISP1,FN1                                                                                                                                                                                                                                                                                                                                               | 2           |
| Embryonic Development                                 | development of somites                        | 4.02E-02 | DISP1,F5                                                                                                                                                                                                                                                                                                                                                | 2           |
| Organismal Development                                | development of somites                        | 4.02E-02 | DISP1,F5                                                                                                                                                                                                                                                                                                                                                | 2           |
| Tissue Development                                    | development of somites                        | 4.02E-02 | DISP1,F5                                                                                                                                                                                                                                                                                                                                                | 2           |
| Cellular Movement                                     | migration of prostate cancer cell lines       | 4.02E-02 | ESRRA,FN1                                                                                                                                                                                                                                                                                                                                               | 2           |
| Inflammatory Response                                 | antibacterial response                        | 4.10E-02 | STAB1,TLR1                                                                                                                                                                                                                                                                                                                                              | 2           |
| Antimicrobial Response                                | antibacterial response                        | 4.10E-02 | STAB1,TLR1                                                                                                                                                                                                                                                                                                                                              | 2           |
| Cancer                                                | papillary thyroid cancer                      | 4.10E-02 | FN1,GOLGA5                                                                                                                                                                                                                                                                                                                                              | 2           |
| Endocrine System Disorders                            | papillary thyroid cancer                      | 4.10E-02 | FN1,GOLGA5                                                                                                                                                                                                                                                                                                                                              | 2           |
| Inflammatory Response                                 | antimicrobial response                        | 4.21E-02 | CHIA,STAB1,TLR1                                                                                                                                                                                                                                                                                                                                         | 3           |
| Antimicrobial Response                                | antimicrobial response                        | 4.21E-02 | CHIA,STAB1,TLR1                                                                                                                                                                                                                                                                                                                                         | 3           |
| Tissue Development                                    | organization of extracellular matrix          | 4.25E-02 | FN1,NDNF                                                                                                                                                                                                                                                                                                                                                | 2           |
| Dermatological Diseases and Conditions                | lichen planus                                 | 4.49E-02 | HLA-DRA,PLXND1                                                                                                                                                                                                                                                                                                                                          | 2           |
| Inflammatory Disease                                  | lichen planus                                 | 4.49E-02 | HLA-DRA,PLXND1                                                                                                                                                                                                                                                                                                                                          | 2           |
| Immunological Disease                                 | lichen planus                                 | 4.49E-02 | HLA-DRA,PLXND1                                                                                                                                                                                                                                                                                                                                          | 2           |
| Cellular Movement                                     | cell movement of T lymphocytes                | 4.53E-02 | AQP3,FN1,STAB1                                                                                                                                                                                                                                                                                                                                          | 3           |
| Hematological System Development and Function         | cell movement of T lymphocytes                | 4.53E-02 | AQP3,FN1,STAB1                                                                                                                                                                                                                                                                                                                                          | 3           |
| Immune Cell Trafficking                               | cell movement of T lymphocytes                | 4.53E-02 | AQP3,FN1,STAB1                                                                                                                                                                                                                                                                                                                                          | 3           |
| Cell-mediated Immune Response                         | cell movement of T lymphocytes                | 4.53E-02 | AQP3,FN1,STAB1                                                                                                                                                                                                                                                                                                                                          | 3           |
| Cellular Movement                                     | migration of breast cancer cell lines         | 4.63E-02 | ESRRA,FN1,ILF3                                                                                                                                                                                                                                                                                                                                          | 3           |
| Cancer                                                | glioblastoma cancer                           | 4.77E-02 | FN1,MKI67,RNF20                                                                                                                                                                                                                                                                                                                                         | 3           |
| Neurological Disease                                  | glioblastoma cancer                           | 4.77E-02 | FN1,MKI67,RNF20                                                                                                                                                                                                                                                                                                                                         | 3           |
| Cancer                                                | hemangioma                                    | 4.90E-02 | MKI67,STAB1                                                                                                                                                                                                                                                                                                                                             | 2           |

**Table S7.** Interaction networks enriched among genes with coding SNPs that are correlated with bacterial taxa abundance.

| ID | Molecules in Network                                                                                                                                                                                                                                                         | Score | Focus Molecules | Top Diseases and Functions                                                                |
|----|------------------------------------------------------------------------------------------------------------------------------------------------------------------------------------------------------------------------------------------------------------------------------|-------|-----------------|-------------------------------------------------------------------------------------------|
| 1  | Akt,ANGPTL1,AQP3,Cg,CHIA,CLEC4A,CYP4Z1,DISC1,ERK1/2,ESRRA,FAM160B2,FN1,HLA-DRA,ILF3,Immunoglobulin,ITIH1,LIMCH1,MIR320,MKI67,PCED1A,PI3K (complex),PLXND1,Pr14a1,RPN1,SBSN,Sema6d,SF3B14,STAB1,STYK1,TAS1R1,TLR1,TTK,Vegf,Vegfr dimer,Ybx1-ps3                               | 42    | 19              | Cellular Movement, Hematological System Development and Function, Immune Cell Trafficking |
| 2  | ACPL2,ALG13,ANKRD18A,ANXA9,ATN1,ATP1B2,BRDT,COASY,DISP1,DPYSL4,FAM101B,FGF1,GJC1,KAT6B,KCNK10,KLHL6,LPCAT1,MAP7D1,MOBP,MURC,NAGLU,NDNF,PRICKLE1,SLC9A2,SSPO,TAGLN3,TEP1,TLDC1,TMEM135,TTC28,UBC,UBXN4,UHRF1BP1,ZSCAN29,ZSWIM8                                                | 29    | 14              | Cell Morphology, Cell Signaling, Cellular Compromise                                      |
| 3  | ABCA10,ADIPOR2,AMZ2,ATP13A3,CALR,CANX,CAPN15,CD1D-CANX-CALR,CHRNA9,COPS5,DACT2,DCHS2,ECHDC3,F5,FAM114A2,GIN1,JMJD1C,LCT,MICU2,miR-483-3p (miRNAs w/seed CACUCCU),NIPA2,OARD1,RNF20,SLC13A3,SLC26A11,SLC35A5,TBC1D10A,TGFB1,TMEM106C,TMEM184B,TP53BP1,TVP23B,UBC,VAT1L,ZNF554 | 23    | 12              | Cell Cycle, Cancer, Cellular Development                                                  |
| 4  | ABCA6,APP,ARL11,ARL6IP6,ARNT2,ATAT1,BHLHB9,CCDC40,CHTF18,CPXM2,CSF2,Csl,DNMT1,DPY19L3,E130116L18Rik,EPDR1,FAM32A,GCA,GOLGA5,GSAP,H2afv,Hist3h2ba,IL10,JAGN1,KCNE1L,NAALADL2,NRIP1,OCEL1,PSEN1,SCEL,SLC36A2,SLC6A11,SUN5,TICRR,ZFP36                                          | 18    | 10              | Cell Death and Survival, Cell-To-Cell Signaling and Interaction, Inflammatory Response    |
| 5  | ADAMTS17,CAMTA1,CCDC124,CCDC168,CEP78,CORO7/CORO7-PAM16,CUL1,DFNA5,DMD,EIF2AK2,FBXL20,FBXO22,FBXO34,FBXW9,GAN,GDAP1,MYOG,NSUN2,PBRM1,PKD1L1,PSMG3,RAP1GAP2,RPL10L,RPL3L,SCNN1D,SLC9A7,SP140,TBCB,TBPL2,TM4SF20,TTC32,TTC7B,UBC,UNC79,ZNF532                                  | 12    | 7               | Developmental Disorder, Hereditary Disorder, Neurological Disease                         |
